# Supplementary material for: Temporal disruption in tuberculosis incidence patterns during COVID-19: a time series analysis in China
Source: PeerJ journal article supplement (doi:10.7717/peerj.18573), 2024-12-13
Supplement: Table_S1.docx [file Table_S1.docx]

**Table S1：**

**Monthly Incidence of Pulmonary Tuberculosis (PTB) in China from January 2007 to February 2023.**

| **Year** | **Jan** | **Feb** | **Mar** | **Apr** | **May** | **Jun** | **Jul** | **Aug** | **Sep** | **Oct** | **Nov** | **Dec** |
| --- | --- | --- | --- | --- | --- | --- | --- | --- | --- | --- | --- | --- |
| 2007 | 115457 | 91235 | 141508 | 148930 | 135933 | 134775 | 134695 | 130404 | 119078 | 111325 | 116503 | 119421 |
| 2008 | 111688 | 101689 | 156679 | 153978 | 142612 | 131699 | 136378 | 122923 | 123998 | 119821 | 110896 | 121114 |
| 2009 | 90160 | 127167 | 139986 | 139915 | 128411 | 142182 | 129537 | 126893 | 124152 | 109343 | 104782 | 120341 |
| 2010 | 105877 | 88759 | 138574 | 133833 | 128598 | 127545 | 122602 | 117221 | 112288 | 101463 | 110414 | 105036 |
| 2011 | 99617 | 98157 | 135848 | 129351 | 125129 | 119344 | 112647 | 115140 | 106925 | 100392 | 110662 | 104710 |
| 2012 | 87893 | 124005 | 138683 | 128663 | 131257 | 118740 | 117359 | 115019 | 106188 | 100091 | 105264 | 98306 |
| 2013 | 104238 | 89582 | 125549 | 121701 | 122172 | 106546 | 113531 | 107051 | 105219 | 100254 | 101595 | 100685 |
| 2014 | 96067 | 88549 | 111975 | 118849 | 106557 | 101463 | 105782 | 97039 | 95893 | 88991 | 86081 | 93000 |
| 2015 | 95151 | 75541 | 113242 | 107997 | 102067 | 102388 | 102986 | 95746 | 95081 | 86024 | 88115 | 89818 |
| 2016 | 86181 | 83527 | 114627 | 103397 | 100500 | 94064 | 92793 | 95924 | 89342 | 83092 | 87963 | 89609 |
| 2017 | 80911 | 92037 | 105633 | 97296 | 101628 | 99001 | 96471 | 100076 | 92494 | 81554 | 89976 | 87630 |
| 2018 | 96125 | 77224 | 110124 | 100054 | 102063 | 91603 | 95338 | 94232 | 88302 | 84680 | 87709 | 83205 |
| 2019 | 88597 | 73096 | 97866 | 101191 | 96106 | 99555 | 93318 | 84304 | 80973 | 75123 | 61753 | 61788 |
| 2020 | 67682 | 44933 | 73427 | 85684 | 83385 | 84952 | 83101 | 76423 | 75409 | 67843 | 69640 | 64097 |
| 2021 | 64813 | 55425 | 80803 | 80548 | 75243 | 73884 | 76648 | 67966 | 67812 | 61391 | 61753 | 61788 |
| 2022 | 61697 | 52596 | 73110 | 61185 | 63590 | 67901 | 71422 | 69019 | 58638 | 51125 | 48352 | 33951 |
| 2023 | 53730 | 71841 | 76331 | 72846 | 69068 | 64788 | 66989 | 66563 | 61859 | 59239 | 57432 | 52826 |
