# Supplementary material for: Temporal disruption in tuberculosis incidence patterns during COVID-19: a time series analysis in China
Source: PeerJ journal article supplement (doi:10.7717/peerj.18573), 2024-12-13
Supplement: Table_S2.docx [file Table_S2.docx]

**Table S2：**

**Predicted Values and 95% Confidence Intervals for Pulmonary Tuberculosis (PTB) Incidence from Three Models (2007–2019): (A) SARIMA Model, (B) Prophet Model, (C) LSTM Model.**

1. SARIMA Model

| **Time** | **Predicted Value** | **The 95% confidence interval for the predicted value** | |
| --- | --- | --- | --- |
| **Lower limit** | **Upper limit** |
| Jan-19 | 83811.72 | 70595.67 | 97027.78 |
| Feb-19 | 79278.94 | 65905.75 | 92652.13 |
| Mar-19 | 108367.48 | 94838.98 | 121895.98 |
| Apr-19 | 100545.76 | 86863.71 | 114227.81 |
| May-19 | 97495.35 | 83661.46 | 111329.24 |
| Jun-19 | 88822.17 | 74838.08 | 102806.25 |
| Jul-19 | 90259.47 | 76126.78 | 104392.15 |
| Aug-19 | 89700.10 | 75420.37 | 103979.84 |
| Sep-19 | 83739.76 | 69314.47 | 98165.05 |
| Oct-19 | 78661.82 | 64092.43 | 93231.21 |
| Nov-19 | 81342.03 | 66629.96 | 96054.11 |
| Dec-19 | 81395.71 | 66542.31 | 96249.10 |

1. Prophet Model

| **Time** | **Predicted Value** | **The 95% confidence interval for the predicted value** | |
| --- | --- | --- | --- |
| **Lower limit** | **Upper limit** |
| Jan-19 | 78971.98 | 71621.39 | 86647.20 |
| Feb-19 | 76735.37 | 69188.55 | 85003.19 |
| Mar-19 | 102106.07 | 94614.89 | 109664.52 |
| Apr-19 | 101423.45 | 93886.88 | 109215.36 |
| May-19 | 95882.78 | 88528.37 | 103516.07 |
| Jun-19 | 94126.23 | 86516.59 | 101496.96 |
| Jul-19 | 92589.99 | 85176.24 | 99979.34 |
| Aug-19 | 89703.81 | 82298.16 | 97220.60 |
| Sep-19 | 84803.38 | 77008.93 | 92094.85 |
| Oct-19 | 78159.34 | 70720.74 | 85768.61 |
| Nov-19 | 82320.68 | 75031.95 | 90666.95 |
| Dec-19 | 82222.74 | 74595.42 | 89366.39 |

1. LSTM Model

| **Time** | **Predicted Value** | **The 95% confidence interval for the predicted value** | |
| --- | --- | --- | --- |
| **Lower limit** | **Upper limit** |
| Jan-19 | 88970.73 | 88970.72 | 88970.75 |
| Feb-19 | 88826.54 | 88826.52 | 88826.56 |
| Mar-19 | 96946.64 | 96946.63 | 96946.66 |
| Apr-19 | 93366.38 | 93366.37 | 93366.40 |
| May-19 | 92888.10 | 92888.09 | 92888.12 |
| Jun-19 | 89652.52 | 89652.51 | 89652.54 |
| Jul-19 | 89943.43 | 89943.41 | 89943.45 |
| Aug-19 | 87408.87 | 87408.85 | 87408.88 |
| Sep-19 | 84006.01 | 84005.99 | 84006.02 |
| Oct-19 | 82368.28 | 82368.27 | 82368.30 |
| Nov-19 | 81986.30 | 81986.28 | 81986.31 |
| Dec-19 | 80824.10 | 80824.09 | 80824.12 |
